# Supplementary material for: Ketene Claisen rearrangement of camphor-derived 1,3-oxathianes: complete control of tertiary and quaternary stereogenic centresElectronic supplementary information (ESI) available: experimental data. See http://www.rsc.org/suppdata/cc/b2/b206857e/
Source: Royal Society of Chemistry journal article supplement (doi:10.1039/b206857e), 2002-10-01

Supplementary Information

**Ketene Claisen Rearrangement of Camphor-derived 1,3-Oxathianes: Complete Control of Tertiary and Quaternary Stereogenic Centres**

Varinder K. Aggarwal,*a Alessandra Lattanzib and Daniel Fuentesa

*aSchool of Chemistry, University of Bristol,Bristol BS8 1TS, UK*

*bDipartimento di Chimica, Università di Salerno, Via S. Allende I, 84081 Baronissi, Salerno, Italy*

**General directions**

1H (250 MHz) and 13C (63 MHz) NMR spectra were run in CDCl3 on a Bruker AC-250 spectrometer supported by an Aspect 3000 data system. The chemical shifts were recorded on the  scale and were measured relative to the residual signal of chloroform at  7.25. 13C chemical shifts were measured from the central peak of chloroform at  77.0. Coupling constants are measured in Hertz. Mass spectra were recorded using a Kratos instrument. Infrared spectra were obtained on a Perkin-Elmer Paragon 1000 FT-IR instrument as CHCl3 solution in NaCl plates. Melting points were determined on a Gallenkamp apparatus and stand uncorrected. Elemental microanalysis were carried out using a Perkin-Elmer 2400 Elemental Analyser CHN, involving classical analysis for sulfur. Optical rotations were recorded on an Optical Activity AA-10 polarimeter at 589 nm with a path lenght of 1 dm. Concentrations (*c*) are quoted in g/100 ml. Thin layer chromatography (TLC) was used routinely to monitor the progress of reactions and purity of compounds. TLC was performed on Merk 60 F254 aluminium backed TLC plates containing fluorescent indicator. Visualisation was achieved with 254 nm UV light and by treatment with either a solution of phosphomolybdic acid (5g in 100 ml 95% ethanol) or 1% w/v aqueous potassium permanganate, followed by warming of the TLC plate with a heat gun. Chromatographic purification of compounds was achieved by flash chromatography using Kieselgel 60 F245 40-63 micron silica gel.

Reactions were generally run in oven dried glassware under nitrogen. Liquid solvents were distilled before use, while solid reagents were generally used as supplied. Solvents were dried and distilled by conventional methods.

**General procedure for the synthesis of camphor 1,3-oxathianes 5**

In a two neck conical flask containing dry CH2Cl2 were added under nitrogen at room temperature (+)-(10)-mercaptoisoborneol (280 mg, 1.5 mmol) and the **,**-unsaturated aldehyde (4.5 mmol) then pyridinium *p*-toluensulfonate (PPTS) (377 mg, 1.5 mmol). The mixture is stirred according to the reaction times reported in Table 1. Then the reaction mixture was loaded directly onto a silica gel column and eluted with petroleum ether.

**(1*R*,4*R*,6*R*,8*R*)-11,11-Dimethyl-4-(*E*)-styryl-5-oxa-3-thiatricyclo[6.2.1.01,6]undecane (5a)**

Isolated yield 98%. Recrystallization from pentane at –20 °C gave white needles. M.p. 65-67 °C. []D24 –74.4 (*c* 0.84, CHCl3). max(CHCl3 solution)/cm-1 2956, 2897, 1451, 1389, 1062.  (250 MHz, CDCl3): 0.80-2.05 (6H, m), 0.91 (3H, s), 1.31 (3H, s), 1.91 (dq, 1H, *J*1=13.5, *J*2=3.6), 2.70 (1H, d, *J*=14.3), 3.13 (1H, d, *J*=14.3), 3.62 (1H, dd, *J*1=7.9, *J*2=3.0), 5.30 (1H, d, *J*=5.5), 6.20 (1H, dd, *J*1=15.8, *J*2=5.5), 6.66 (1H, d, *J*=15.8), 7.10-7.45 (5H, m). C(63 MHz, CDCl3): 20.5, 23.4, 27.3, 29.2, 34.5, 37.9, 42.1, 45.6, 46.7, 81.3, 85.3, 126.3, 126.7, 127.9, 128.5, 131.7, 136.3. *m/z* (EI) 300 (M+, 89%), 168 (100), 147 (38), 135 (85), 121 (70), 107 (37), 93 (48), 79 (25). (Requires M+ 300.1547, found 300.1541). Anal. Calcd for C19H24OS: C, 75.95; H, 8.05; S, 10.67 Found: C, 75.73; H, 8.08; S, 10.70.

**(1*R*,4*R*,6*R*,8*R*)-11,11-Dimethyl-4-(*E*)-propenyl-5-oxa-3-thiatricyclo [6.2.1.01,6]undecane (5b)**

Isolated yield 92%. Recrystallization from pentane at –20 °C gave a white solid. M.p. 57-59 °C. []D24 –138.6 (*c* 1.50, CH2Cl2). max (CHCl3 solution)/cm-1 2955, 2879, 1453, 1389, 1068.  (250 MHz, CDCl3): 0.80-1.08 (2H, m), 0.90 (3H, s), 1.32 (3H, s), 1.39-1.53 (1H, m), 1.58-1.75 (3H, m), 1.69 (3H, d, *J*=6.4), 1.90 (dq, 1H, *J*1=13.4, J2=3.6), 2.70(1H, d, *J*=14.0), 3.12 (1H, d, *J*=14.0), 3.60 (1H, dd, *J*1=7.9, *J*2=3.4), 5.11 (1H, d, *J*=6.2), 5.58 (1H, ddd, *J*1=15.4, *J*2=6.2, *J*3=1.5), 5.68 (1H, dq, *J*1=15.4, *J*2=6.2).

C(63 MHz, CDCl3): 17.8, 20.5, 23.3, 27.3, 29.0, 34.5, 37.9, 42.0, 45.5, 46.7, 81.2, 85.2, 128.5, 129.2. *m/z* (EI) 238 (M+, 70%), 168 (100), 153 (32), 135 (76), 125 (42), 121 (74), 107 (57), 93 (67), 79 (39), 69 (34). (Requires M+ 238.1391, found 238.1390). Anal. Calcd for C14H22OS: C, 70.54; H, 9.30; S, 13.45 Found: C, 70.38; H, 9.43; S, 13.61.

**(1*R*,4*R*,6*R*,8*R*)-11,11-Dimethyl-4-penta-(1*E*,3*E*-dienyl)-5-oxa-3-thia-tricyclo [6.2.1.01,6]undecane (5c)**

Isolated yield 51%. Recrystallization from absolute ethanol at –20 °C gave white needles. M.p. 54-56 °C. []D23 –117.6 (*c* 1.19, CH2Cl2). max (CHCl3 solution)/cm-1 2957, 2881, 1454, 1069.  (250 MHz, CDCl3): 0.80-1.08 (2H,m), 0.90 (3H, s), 1.33 (3H, s), 1.39-1.54 (1H, m), 1.58-1.76 (3H, m), 1.73 (3H, d, *J*=7.9), 1.92 (1H, dq, *J*1=13.5, *J*2=3.5), 2.72 (1H, d, *J*=14.0), 3.14 (1H, d, *J*=14.0), 3.62 (1H, dd, *J*1=7.9, *J*2=3.3), 5.20 (1H, d, *J*=6.1), 5.61 (1H, dd, *J*1=15.2, *J*2=6.1), 5.76 (1H, dq, *J*1=15.2, *J*2=7.9), 6.00 (1H, dd, *J*1=14.8, *J*2=9.3), 6.32 (1H, dd, *J*1=14.8, *J*2=10.5). C(63 MHz, CDCl3): 18.2, 20.5, 23.4, 27.3, 29.2, 34.5, 37.9, 42.0, 45.5, 46.7, 81.1, 85.2, 126.9, 130.5, 131.3, 132.3. *m/z* (EI) 264 (M+, 100%), 168 (68), 135 (67), 121 (44), 107 (26), 93 (34), 79 (19). (Requires M+ 264.1547, found 264.1542). Anal. Calcd for C16H24OS: C, 72.67; H, 9.15; S, 12.13 Found: C, 72.60; H, 9.30; S, 12.09.

**(1*R*,4*R*,6*R*,8*R*)-11,11-Dimethyl-4-[(*E*)-2-phenyl-propenyl)]-5-oxa-3-thia-tricyclo [6.2.1.01,6]undecane (5d)**

Isolated yield 99%. Recrystallization from pentane at –20 °C gave white solid. M.p. 88-90 °C. []D24 –157.9 (*c* 1.38, CHCl3). max (CHCl3 solution)/cm-1 2947, 2874, 1446, 1067.  (250 MHz, CDCl3): 0.80-1.10 (2H, m), 0.93 (3H, s), 1.38 (3H, s), 1.39-1.55 (1H, m), 1.58-1.76 (3H,m), 1.93 (1H, dq, *J*1=13.5, *J*2=3.7), 2.13 (3H, d, *J*=1.2), 2.75 (1H, d, *J*=14.0), 3.22 (1H, d, *J*=14.0), 3.69 (1H, dd, *J*1=7.9, *J*2=3.3), 5.54 (1H, d, *J*=7.9), 5.83 (1H, dq, *J*1=7.9, *J*2=1.2), 7.10-7.40 (5H, m). C(63 MHz, CDCl3): 16.7, 20.5, 23.4, 27.4, 29.1, 34.7, 37.9, 41.7, 45.5, 46.7, 79.4, 85.1, 125.1, 126.0, 127.5, 128.2, 138.2, 142.2. *m/z* (CI) 315 (M+1, 76%), 168 (75), 147 (100), 135 (44), 121 (31), 107 (16). (Requires M+1 315.1782, found 315.1772). Anal. Calcd for C20H26OS: C, 76.38; H, 8.33, S, 10.20 Found: C, 76.08; H, 8.34, S, 10.16.

**(1*R*,4*R*,6*R*,8*R*)-4-(2,6)-(Dimethyl-hepta-1,5-dienyl)-11,11-Dimethyl-5-oxa-3-thia-tricyclo[8.4.0.11,12]pentadec-7-en-4-one (5e)**

Isolated yield 78% (*E*/*Z* diastereoisomeric mixture 84/16 ratio). max (CHCl3 solution)/cm-1 2955, 2879, 1453, 1069.  (250 MHz, CDCl3) major diastereoisomer: 0.79-1.08 (2H, m), 0.84 (3H, s), 1.29 (3H, s), 1.32-1.71 (6H, m), 1.60 (3H, s), 1.65 (3H, s), 1.66 (3H, s), 1.84 (1H, dq, *J*1=13.5, *J*2=3.6), 1.88-2.10 (2H, m), 2.64 (1H, d, *J*=14.3), 3.10 (1H, d, *J*=14.3), 3.57 (1H, dd, *J*1=7.9, *J*2=3.3, 4.90-5.10 (1H, m), 5.15-5.25 (1H, m), 5.30 (1H, d, *J*=8.2). C(63 MHz, CDCl3) major diastereoisomer: 17.1, 17.7, 20.5, 23.3, 25.7, 26.3, 27.3, 29.0, 34.7, 37.9, 39.3, 41.6, 45.5, 46.6, 78.5, 85.0, 122.3, 123.8, 131.7, 140.2. *m/z* (CI) 321 (M+1, 91%), 168 (100), 153 (62), 135 (92), 121 (50), 107 (25), 95 (27). (Requires M+1 321.2252, found 321.2252). Anal. Calcd for C20H32OS: C, 74.94; H, 10.06; S, 10.00 Found: C, 74.88; H, 10.10; S, 10.08.

**(1*R*,4*R*,6*R*,8*R*)-11,11-Dimethyl-4-(*E*)-*p*-nitro-styryl-5-oxa-3-thiatricyclo[6.2.1.01,6]undecane (5f)**

Isolated yield 88%. Recrystallization from pentane at –20 °C gave pale yellow needles. M.p. 88-90 °C. []D24 –28.0 (*c* 1, CH2Cl2). max(ATR)/cm-1 2952, 2883, 1596, 1510, 1340.  (400 MHz, CDCl3): 0.80-2.08 (6H, m), 0.93 (3H, s), 1.37 (3H, s), 2.03 (dq, 1H, *J*1=13.3, *J*2=3.7), 2.80 (1H, d, *J*=14.2), 3.22 (1H, d, *J*=14.2), 3.71 (1H, dd, *J*1=8.2, *J*2=2.9), 5.42 (1H, d, *J*=5.6), 6.46 (1H, dd, *J*1=15.9, *J*2=5.6), 6.80 (1H, d, *J*=15.9), 7.57 (2H, d, *J*=7.8), 8.17 (2H. d, *J*=7.8). C(68 MHz, CDCl3): 20.5, 23.4, 27.5, 29.8, 34.5, 37.9, 42.8, 46.0, 47.4, 81.3, 85.5, 124.0, 127.3, 129.4, 131.0, 142.8, 168.7. *m/z* (EI) 346 (M+, 18%), 168 (100), 153 (30), 135 (98), 125 (42), 121 (76), 107 (56), 93 (74), 79 (46), 67 (32). Anal. Calcd for C19H23NO3S: C, 66.06; H, 6.71; N, 4.05; S, 9.28 Found: C, 66.00; H, 7.06; N, 4.14; S, 9.09.

**Rearrangement of 5a with dichloroketene generated *in situ* under reductive conditions**

**Activation of zinc**

A stirred suspension of zinc dust (0.15 mol, 10 g) in 40 ml of water was degassed by bubbling nitrogen through it for 15 min. Then (4.7 mmol, 750 mg ) of CuSO4 was added at once. The black suspension was stirred while nitrogen was bubbled through it for an additional 45 min. The Zn-Cu couple was collected on a sintered glass funnel under a stream of nitrogen and washed successively with 100 ml of degassed water and acetone. The Zn-Cu couple was transferred to a small flask under a stream of nitrogen and dried at reduced pressure (0.2 mm) for 2 h. Nitrogen was admitted to the system when the vacuum was broken and Zn-Cu couple stored under nitrogen in a tightly stoppered flask.

**General procedure**

A two necked flask was purged with nitrogen and then charged with **5a** (1 mmol, 300 mg) and Zn-Cu couple (1.2 mmol, 78 mg) in freshly distilled Et2O (2 ml). Then under stirring at room temperature trichloroacetyl chloride (1.1 mmol, 0.123 ml) is slowly added in 1h time to this suspension. The mixture is stirred for the times reported in Table 2. The reaction mixture was then filtered through a pad of Celite and the unreacted zinc washed with Et2O. The ethereal solution was washed with water, then saturated NaHCO3 solution and dried with anhydrous K2CO3, concentrated *in vacuo* and the crude was purified by flash column chromatography using petroleum as eluent to furnish **9a**. In entry 4 of Table 2 trichloroacetyl chloride (1.1 mmol) was added with POCl3 (1.1 mmol, 0.101 ml) in distilled Et2O (1 ml). In entry 5 trichloroacetyl chloride (1.1 mmol) was added to the ethereal solution containing 200µl of DME.

**(1*R*,6*S*,8*R*,10*R*)-5,5-Dichloro-13,13-dimethyl-6-(*E*)-styryl-7-oxa-3-thia- tricyclo [6.4.0.11,10]tridecan-4-one (9a)**

Recrystallization from pentane at –20 °C gave a white solid. M.p. 134-136°C. []D27 +77. 8 (*c* 1.35, CH2Cl2). max (CHCl3 solution)/cm-1 2955, 2879, 1665, 1455, 1306, 1072. H (250 MHz, CDCl3): 0.87 (3H, s), 0.95-1.35 (2H, m), 1.14 (3H, s), 1.35-1.80 (4H, m), 1.93 (1H, dq, *J*1=3.7, *J*2=3.5), 2.61 (1H, d, *J*=14.6), 3.51 (1H, dd, *J*1=7.7, *J*2=3.5), 4.22 (1H, d, *J*=14.6), 4.45 (1H, dd, *J*1=5.4, *J*2=1.2), 6.49 (1H, dd, *J*1=15.8, *J*2=5.4), 6.75 (1H, d, *J*1=15.8, *J*2=1.2). C (63 MHz, CDCl3): 20.0, 20.2, 26.6, 30.5, 35.8, 39.8, 46.0, 47.7, 56.1, 88.4, 89.3, 94.9, 123.9, 126.9, 128.3, 128.7, 134.7, 136.2, 194.6. *m/z* (EI) 411 (M+, 28%), 357 (25), 247 (30), 219 (62), 197 (42), 169 (100), 154 (53), 149 (26). (Requires M+ 411.0952, found 411.0985).

**Rearrangement of 5 with dichloroketene generated *in situ* under elimination conditions**

**General procedure A**

A solution of **5** (1 mmol) and dichloroacetyl chloride (1.1 mmol, 0.106 ml) in freshly distilled hexane (2.5 ml) was stirred at room temperature under nitrogen and a solution of freshly distilled triethylamine (1.2 mmol, 0.168 ml) in hexane (1 ml) was slowly added during 1h. After the end of the addition the reaction was monitored by TLC (using petroleum/diethyl ether 95/5). Dichloromethane (30 ml) and water was added to the crude and then the organic layer was extracted with water till neutrality. The combined organic extracts were dried with anhydrous K2CO3, concentrated *in vacuo* and purified by flash chromatography (in the cases of **7** **a**, **d**, **e**) (diethyl ether/petroleum ether 2/98, silica gel pre-treated with 1% Et3N) to afford **7** as solid and/or by recrystallization of the crude (in the cases of **7** **a**, **b**, **c** from pentane or pentane/absolute ethanol (9:1).

**General procedure B**

At the end of this study it was found that more consistent and higher yields could be achieved by adding reagents in a different order (given below). This method was only applied to **5a** and **5f** but it is expected that higher yields would also be observed with the other substrates.

To a round bottomed flask containing thioacetal **5a** (0.33 mmol, 100 mg) was added dry CH2Cl2 (1.5 ml) followed by freshly distilled Et3N (0.66 mmol, 67 mg). Then, a solution of dichloroacetyl chloride (0.49 mmol, 73 mg) in dry CH2Cl2 (1 ml) was added slowly *via* syringe pump over 1 h at room temperature. The resulting dark brown solution was stirred for an additional 30 min. at room temperature. The reaction mixture was then concentrated *in vacuo* and hexane (10 ml) was added. After filtering through celite, the solution was concentrated under reduced pressure and the resulting solid recrystallized from pentane at –20 oC to give **7a** as a white solid. **7f** was purified by silica gel (pre-treated with 1% of Et3N) chromatography (Et2O / petroleum ether, 2/98).

**(1*R*,6*S*,10*R*,12*R*)-5,5-Dichloro-15,15-dimethyl-6-phenyl-9-oxa-3-thia-tricyclo[8.4.0.11,12]pentadec-7-(*E*)-en-4-one (7a)**

Following procedure A: isolated yield 95% after silica gel (pre-treated with 1% Et3N) chromatography (diethyl ether/petroleum ether 2/98). Following procedure B: isolated yield 95% after recrystallization from pentane at –20 oC. In both cases **7a** was obtained as a white solid. M.p. 149-151°C. []D23 –11.3 (*c* 1.42, CH2Cl2). max (CHCl3 solution)/cm-1 2958, 2884, 1660, 1454, 1392, 1169. H (250 MHz, CDCl3): 0.80-1.09 (2H, m), 0.86 (3H, s), 1.19 (3H, s), 1.44-1.79 (4H, m), 1.90 (1H, dq, *J*1=13.7, *J*2=3.6), 2.99 (1H, d, *J*=15.5), 3.51 (1H, d, *J*=15.5), 3.73 (1H, dd, *J*1=7.9, *J*2=3.3), 3.90 (1H, d, *J*=10.9), 5.19 (1H, dd, *J*1=10.9, *J*2=12.2), 5.86 (1H, d, *J*=12.2), 7.25-7.55 (5H, m). C (63 MHz, CDCl3): 20.7, 21.6, 27.5, 31.1, 36.1, 38.5, 45.5, 47.3, 54.9, 57.7, 90.3, 94.2, 102.0, 127.9, 128.2, 130.4, 135.0, 151.3, 199.6. *m/z* (EI) 411 (M+, 40%), 391 (52), 307 (31), 278 (100), 207 (52). (Requires M+ 411.0952, found 411.0932). Anal. Calcd for C21H24Cl2O2S: C, 61.31; H, 5.88; S, 7.79; Cl, 17.24. Found: C, 61.15; H, 5.91; S, 7.95; Cl, 17.25.

**(1*R*,6*R*,10*R*,12*R*)-5,5-Dichloro-6,15,15-trimethyl-9-oxa-3-thia-tricyclo[8.4.0.11,12]pentadec-7-(*E*)-en-4-one (7b)**

Yield 67% after recrystallization of the crude from pentane at –20 °C to give a white solid. M.p. 108-110°C. []D23 –96.3 (*c* 0.84, CH2Cl2). max (CHCl3 solution)/cm-1 2958, 2884, 1677, 1455, 1390, 1011. H (250 MHz, CDCl3): 0.80-1.10 (2H, m), 0.83 (3H, s), 1.13 (3H, s), 1.28 (3H, d, *J*=6.7), 1.40-1.75 (4H, m), 1.87 (1H, dq, *J*1=13.9, *J*2=3.7), 2.85 (1H, dq, *J*1=10.2, *J*2=6.7), 2.94 (1H, d, *J*=15.5), 3.44 (1H, d, *J*=15.5), 3.69 (1H, dd, *J*1=8.2, *J*2=3.3), 4.53 (1H, dd, *J*1=12.5, *J*2=10.2) 5.75 (1H, d, *J*=12.5). C(63 MHz, CDCl3): 14.4, 20.6, 21.5, 27.5, 30.9, 36.1, 38.5, 45.4, 47.2, 48.4, 54.7, 90.0, 95.8, 104.8, 150.8, 200.0. *m/z* (EI) 348 (M+, 6%), 278 (51), 168 (79), 135 (100), 121 (93), 107 (59), 93 (86), 79 (54), 67 (31), 53 (51). (Requires M+ 348.0717, found 348.0718). Anal. Calcd for C16H22Cl2O2S: C, 55.01; H, 6.35; S, 9.18; Cl 20.30. Found: C, 54.44; H, 6.36; S, 8.91; Cl 20.25.

**(1*R*,6*R*,10*R*,12*R*)-5,5-Dichloro-15,15-dimethyl-6-(*E*)-propenyl-9-oxa-3-thia-tricyclo[8.4.0.11,12]pentadec-7-(*E*)-en-4-one (7c)**

Isolated yield 70% after recrystallization of the crude from pentane/absolute ethanol (9:1) at –20 °C to give a white solid. M.p. 67-69°C. []D27 –69.6 (*c* 1.12, CH2Cl2). max (CHCl3 solution)/cm-1 2956, 2879, 1675, 1450, 1391, 1106. H (250 MHz, CDCl3): 0.81-1.09 (2H, m), 0.84 (3H, s), 1.14 (3H, s), 1.40-1.65 (4H, m), 1.70 (3H, d, *J*=3.6), 1.88 (1H, dq, *J*1=13.7, *J*2=3.6), 2.94 (1H, d, *J*=15.5), 3.33 (1H, dd, *J*1=10.5, *J*2=2.5), 3.45 (1H, d, *J*=15.5), 3.70 (1H, dd, *J*1=7.9, *J*2=3.0), 4.67 (1H, dd, *J*1=10.3, *J*2=12.5). C(63 MHz, CDCl3): 18.2, 20.6, 21.5, 27.5, 30.9, 36.1, 38.5, 45.4, 47.2, 54.7, 55.8, 90.2, 94.1, 102.9, 125.0, 131.5, 151.2, 199.5. *m/z* (EI) 374 (M+, 10%), 278 (40), 168 (58), 153 (14), 135 (100), 121 (20), 107 (32), 95 (17). (Requires M+ 374.0874, found 374.0858).

**(1*R*,6*S*,10*R*,12*R*)-5,5-Dichloro-6,15,15-trimethyl-6-phenyl-9-oxa-3-thia-tricyclo[8.4.0.11,12]pentadec-7-(*E*)-en-4-one (7d)**

Dense oil: max (CHCl3 solution)/cm-1 2960, 2880, 1677, 1659, 1500, 1462, 1386, 1194, 1108, 1070. H (400 MHz, CDCl3): 0.80-1.30 (4H, m), 0.92 (3H, s), 1.27 (3H, s), 1.60-1.80 (1H, m), 1.70 (3H, s,), 1.84 (1H, dd, *J*1=13.7, *J*2=8.2), 2.01 (1H, dq, *J*1=13.7, *J*2=3.2), 3.01 (1H, d, *J*=15.6), 3.47 (1H, d, *J*=15.6), 3.80 (1H, dd, *J*1=8.1, *J*2=3.2), 5.57 (1H, d, *J*=12.4), 6.03 (1H, d, *J*=12.4), 7.28-7.37 (3H, m), 7.74 (2H, m). C(100 MHz, CDCl3): 20.5, 21.5, 22.5, 27.3, 29.6, 35.7, 38.7, 45.2, 47.1, 54.4, 55.4, 84.2, 90.3, 110.4, 127.3, 127.5, 127.8, 142.4, 150.7, 196.9. *m/z* (EI) 315 (16), 168 (51), 161 (41), 147 (38), 135 (81), 121 (63), 108 (54), 93 (92), 77 (56), 41 (100). Anal. Calcd for C22H26Cl2O2S: C, 62.11; H, 6.16; S, 7.54; Cl 16.67. Found: C, 61.98; H, 6.10; S, 7.61; Cl 16.56.

**(1*R*,6*S*,10*R*,12*R*)-5,5-Dichloro-6,15,15-trimethyl-6-phenyl-9-oxa-3-thia-tricyclo[8.4.0.11,12]pentadec-7-(*Z*)-en-4-one (7d)**

Isolated yield 96%. Recrystallization from pentane at –20 °C gave a white solid. M.p. 152-154°C. []D23 –17.8 (*c* 1.01, CH2Cl2). max (CHCl3 solution)/cm-1 2958, 2884, 1660, 1446, 1392, 1098. H (250 MHz, CDCl3): 0.80-1.10 (2H, m), 0.84 (3H, s), 1.06 (3H, s), 1.40-1.90 (5H, m), 2.12 (3H, d, *J*=1.5), 2.57 (1H, d, *J*=14.6), 3.53 (1H, dd, *J*1=7.6, *J*2=3.6), 4.31 (1H, d, *J*=14.6), 4.55 (1H, d, *J*=8.5), 6.08 (1H, dq, *J*1=8.5, *J*2=1.5), 7.25-7.50 (5H, m). C(63 MHz, CDCl3): 17.3, 20.0, 20.2, 26.5, 30.2, 35.7, 40.0, 46.0, 47.7, 56.2, 84.6, 88.8, 96.0, 123.4, 126.1, 127.8, 128.4, 139.7, 142.4, 195.0. *m/z* (CI) 425 (M+1, 22%), 391 (15), 315 (100), 168 (47), 147 (78), 135 (34), 121 (20), 108 (11), 95 (9). (Requires M+ 424.1030, found 424.1029). Anal. Calcd for C22H26Cl2O2S: C, 62.11; H, 6.16; S, 7.54; Cl 16.67. Found: C, 61.92; H, 6.15; S, 7.67; Cl 16.42.

**(1*R*,6*R*,10*R*,12*R*)-5,5-Dichloro-6,15,15-trimethyl-6-(4-methyl-pent-3-enyl)-9-oxa-3-thia-tricyclo[8.4.0.11,12]pentadec-7-en-4-one (7e)**

solated yield 76% as a diastereoisomeric mixture (84/16). max (CHCl3 solution)/cm-1 2955, 1679, 1658, 1455, 1378, 1136, 1111, 1043. H (250 MHz, CDCl3) major diastereoisomer: 0.83 (3H, s), 0.75-1.95 (11H, m), 1.15 (3H, s), 1.23 (3H, s), 1.53 (3H, s), 1.62 (3H, s), 2.96 (1H, d, *J*=15.5), 3.29 (1H, d, *J*=15.5), 3.69 (1H, dd, *J*1=8.1, *J*2=3.5), 4.82 (1H, d, *J*=12.5), 4.90-5.10 (1H, m), 5.76 (1H, d, *J*=12.5). C(63 MHz, CDCl3) major diastereoisomer: 17.7, 18.4, 20.6, 21.6, 22.8, 25.7, 27.5, 31.5, 36.0, 35.9, 38.5, 45.5, 47.2, 50.4, 54.8, 81.2, 90.4, 99.7, 110.2, 123.9, 132.0, 150.8, 197.8. *m/z* (EI) 430 (M+, 5%), 394 (8), 371 (11), 342 (8), 278 (60), 168 (88), 135 (100), 121 (21), 107 (20), 93 (26), 79 (14), 69 (22), 55 (9). (Requires M+ 430.1500, found 430.1492).

**(1*R*,6*S*,10*R*,12*R*)-5,5-Dichloro-15,15-dimethyl-6-*p*-nitrophenyl-9-oxa-3-thia-tricyclo[8.4.0.11,12]pentadec-7-(*E*)-en-4-one (7f)**

Following procedure B: isolated yield 91% after silica gel (pre-treated with 1% Et3N) chromatography (diethyl ether/petroleum ether, 2/98) to give a white solid. M.p. 134-136 °C. []D24 +2.2 (*c* 0.5, CH2Cl2). max (ATR)/cm-1 2952, 2873, 1680, 1520, 1347, 1166, 1048. H (400 MHz, CDCl3): 0.80-1.30 (2H, m), 0.95 (3H, s), 1.27 (3H, s), 1.50-1.88 (4H, m), 1.98 (1H, dq, *J*1=13.5, *J*2=3.7), 3.09 (1H, d, *J*=15.4), 3.59 (1H, d, *J*=15.4), 3.84 (1H, dd, *J*1=7.7, *J*2=3.3), 4.09 (1H, d, *J*=11.1), 5.21 (1H, dd, *J*1=12.1, *J*2=11.1), 598 (1H, d, *J*=12.1), 7.66 (2H, d, *J*=8.7), 8.23 (2H, d, *J*=8.7). C (68 MHz, CDCl3): 21.0, 21.9, 27.8, 31.8, 36.0, 37.9, 46.0, 50.0, 55.7, 57.8, 88.1, 91.2, 96.8, 123.5, 123.9, 131.8, 132.3, 152.1, 196.4. *m/z* (EI) 459 (M+, 4%), 385 (16), 345 (72), 278 (32), 168 (88), 135 (100), 121 (48), 107 (50), 93 (66), 79 (38), 67 (24). Anal. Calcd for C21H23Cl2NO4S: C, 55.27; H, 5.08; N, 3.07; S, 7.03; Cl, 15.54. Found: C, 53.68; H, 5.04; N, 2.47; S, 7.03; Cl, 15.94.

### NMR NOESY experiment of 7f


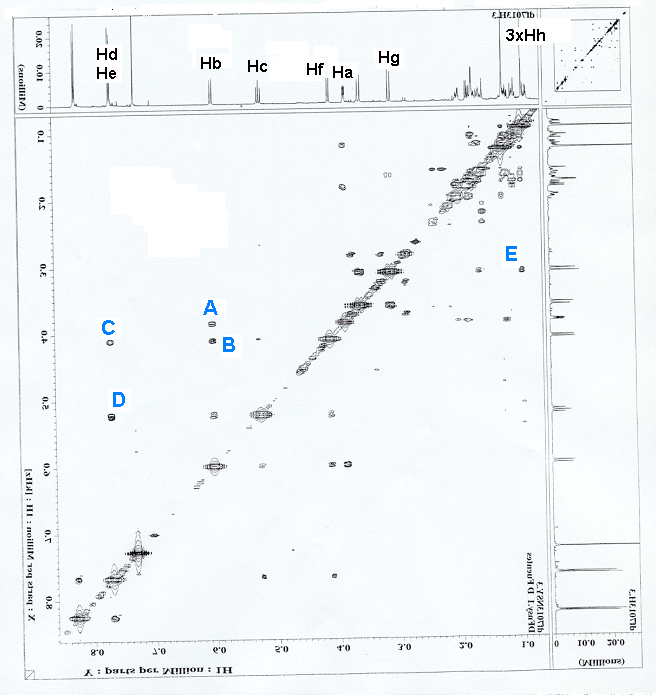

Supplement: b206857e.doc [file b206857e.doc]
